# Supplementary material
Source: Royal Society of Chemistry journal article supplement (doi:10.1039/d6cc01555g)
Supplement: d6cc01555g1.pdf [file d6cc01555g1.pdf]

## Supplementary Information

### Spectral Decoupling Between Radioluminescence and Persistent

### Luminescence in Bi<sup>3+</sup>-Doped LiLu(WO<sub>4</sub>)<sub>2</sub> for High-Security Information

### Encryption

Xiaofeng Lin<sup>a</sup>, Rongyi Kuang<sup>a</sup>, Huiwang Lian<sup>a</sup>, Ningyi Li<sup>b</sup>, Yurii Orlovskii<sup>c</sup>, Victor Loschenov<sup>c</sup>, Vladimir Makhov<sup>d</sup>, Bo-Mei Liu<sup>e,\*</sup>, Rui Zou<sup>f,\*</sup>, Jing Wang<sup>a,g,\*</sup>

<sup>a</sup>Ministry of Education Key Laboratory of Bioinorganic and Synthetic Chemistry, State Key Laboratory of Optoelectronic Materials and Technologies, School of Chemistry, Sun Yat-sen University; Guangzhou 510006, China

<sup>b</sup>Zhongshan School of Medicine, Sun Yat-sen University; Guangzhou 510080, China

<sup>c</sup>Prokhorov General Physics Institute of the Russian Academy of Sciences, Vavilov str. 38, Moscow 119991, Russia.

<sup>d</sup>P. N. Lebedev Physical Institute, 53 Leninskiy Prospekt, Moscow 119991, Russia.

<sup>e</sup>School of Chemical Engineering and Light Industry, Guangdong University of Technology; Guangzhou 510006, China

<sup>f</sup>Department of Nuclear Medicine, The Third Affiliated Hospital of Sun Yat-sen University; Guangzhou 510006, China

<sup>g</sup>Northeast Guangdong Key Laboratory of New Functional Materials, Guangdong Rare Earth Photofunctional Materials Engineering Technology Research Center, School of Chemistry and Environment, Jiaying University, Meizhou, 514015, China

\*Corresponding author.

E-mail: liubomei@gdut.edu.cn (Bo-Mei Liu), zour3@mail.sysu.edu.cn (Rui Zou), ceswj@mail.sysu.edu.cn (Jing Wang)

## Experimental section

### Synthesis

Materials and methods: The phosphor materials were synthesized by the high-temperature solid-state reaction method. Firstly, raw materials of  $\text{Li}_2\text{CO}_3$  (99.95%, Aladdin),  $\text{Lu}_2\text{O}_3$  (99.99, Aladdin),  $\text{WO}_3$  (99.95%, Aladdin) and  $\text{Bi}_2\text{O}_3$  (99.95%, Aladdin) were weighed according to the stoichiometric composition of  $\text{LiLu}_{1-x}(\text{WO}_4)_2:\text{xBi}^{3+}$  ( $x = 0, 0.05, 0.1, 0.2, 0.5, 1$  mol%). After being ground thoroughly, the mixed powders were transferred into an alumina crucible, pre-fired at 600 °C for 4 h, subsequently sintered at 1000 °C for 5 h in a furnace. The used heating rate is 5 °C  $\text{min}^{-1}$ . Finally, after cooling to room temperature (RT), the synthesized compounds were ground again before further measurement.

### Preparation of composite films

Polydimethylsiloxane (PDMS, SYLGARD<sup>®</sup> 184, Dow Corning) was chosen as the matrix for  $\text{LiLu}(\text{WO}_4)_2$  (LLWO) and  $\text{LLWO}:0.5\%\text{Bi}^{3+}$ . First, 2.0 g of PDMS base resin and 0.2 g of curing agent were mixed in a beaker. After that, 2.0 g of  $\text{LLWO}:0.5\%\text{Bi}^{3+}$  were dispersed in the PDMS precursor with stirring thoroughly. Then, the mixed well products were transferred into prepared mold. After curing at 70 °C for 12 h, the composite films with the target shape were obtained.

### Characterization

X-ray diffraction (XRD) patterns were measured by a Rigaku D/MAX 2200 VPC diffractometer (40 kV and 26 mA) equipped with Cu  $\text{K}\alpha$  radiation ( $\lambda = 1.5405 \text{ \AA}$ ). The morphology of samples was studied by Gemi 500 scanning electron microscope (SEM) equipped with energy-dispersive X-ray spectroscopy (EDS). Photoluminescence excitation (PLE), photoluminescence (PL), radioluminescence, and persistent luminescence were recorded using a spectrometer (Edinburgh, FLS1000) equipped with a 450 W Xe lamp, a visible PMT detector, and an external X-ray tube (AMPTEK, Mini-X). The spectral slit width used for the PersL decay tests was 10 nm. Prior to each test series, the phosphors were charged for 5 minutes using different light sources, and data recording commenced after a 5 s decay period. X-ray photoelectron spectra (XPS) were performed on a photoelectron

spectrometer (ESCALAB, Xi+) with Al K $\alpha$  as the X-ray source. The data of the reflection spectra were collected on an UV-vis-NIR spectrophotometer (Agilent, Cary 5000). Thermoluminescence (TL) glow curves were collected in an LTTL-3DS thermoluminescence spectrophotometer (Guangzhou Radiation Technology Co., Ltd.) in the temperature range for 300 to 650 K, heating at a linear rate of 5 K s<sup>-1</sup>. The photographs were taken using a smartphone (Honor 90).

### Trap depth calculation

The characteristic trap depth  $E$  (eV) was estimated using the Hoogenstraaten method:

$$\frac{\beta E}{k_B \cdot T_m^2} = s \exp\left(\frac{-E}{k_B \cdot T_m}\right) \quad (\text{Eq. S1})$$

Where  $\beta$  (K s<sup>-1</sup>) is the heating rate,  $k_B$  is the Boltzmann constant, and  $s$  (s<sup>-1</sup>) is the frequency factor. By rearranging the equation, the trap depth  $E$ (eV) is obtained from the slope of the linear fit of  $\ln(T_m^2/\beta)$  versus  $(k_B T_m)^{-1}$ . Applying this method to the TL data presented in Fig. S12b,c yielded the corresponding  $E_1$  and  $E_2$  values.

## Supplementary Tables (Table S1-2)

**Table S1.** The recent X-ray activated PersL materials.

| Material                                                                                                                 | RL (nm)  | PersL (nm) | Spectral overlap type | Duration (h) | Ref.      |
|--------------------------------------------------------------------------------------------------------------------------|----------|------------|-----------------------|--------------|-----------|
| LiLu(WO <sub>4</sub> ) <sub>2</sub> :Bi <sup>3+</sup>                                                                    | 500      | 550        | Partial               | 8            | This work |
| Cs <sub>2</sub> NaYF <sub>6</sub> :Pr <sup>3+</sup>                                                                      | 250      | 250        | Full                  | 2            | 1         |
| CaF <sub>2</sub> :Gd <sup>3+</sup>                                                                                       | 313      | 313        | Full                  | 24           | 2         |
| YBO <sub>3</sub> :Bi <sup>3+</sup> ,Li <sup>+</sup>                                                                      | 321      | 326        | Full                  | 2            | 3         |
| LaGaO <sub>3</sub> :Bi <sup>3+</sup> ,Sb <sup>3+</sup>                                                                   | 372      | 372        | Full                  | 2000         | 4         |
| Sr <sub>4</sub> Al <sub>14</sub> O <sub>25</sub> :Eu <sup>2+</sup> ,Dy <sup>3+</sup> ,<br>B <sup>3+</sup>                | 490      | 490        | Full                  | 1            | 5         |
| SrAl <sub>2</sub> O <sub>4</sub> :Eu <sup>2+</sup> ,Dy <sup>3+</sup> ,B <sup>3+</sup>                                    | 520      | 520        | Full                  | 1            | 5         |
| LaF <sub>3</sub> :Tb <sup>3+</sup>                                                                                       | 542      | 542        | Full                  | -            | 6         |
| Zn <sub>2</sub> SiO <sub>4</sub> :Mn <sup>2+</sup> ,Yb <sup>3+</sup> ,Li <sup>+</sup>                                    | 520-550  | 520-550    | Full                  | 3            | 7         |
| NaYF <sub>4</sub> :Er <sup>3+</sup>                                                                                      | 540      | 540        | Full                  | 20           | 8         |
| NaYF <sub>4</sub> :Tb <sup>3+</sup>                                                                                      | 550      | 550        | Full                  | -            | 9         |
| NaLuF <sub>4</sub> :Tb <sup>3+</sup>                                                                                     | 550      | 550        | Full                  | 720          | 10        |
| CaF <sub>2</sub> :Tb <sup>3+</sup> @CaLuF <sub>5</sub>                                                                   | 550      | 550        | Full                  | -            | 11        |
| CsY <sub>2</sub> F <sub>7</sub> :Tb <sup>3+</sup> @NaYF <sub>4</sub>                                                     | 550      | 550        | Full                  | 0.7          | 12        |
| CsCdCl <sub>3</sub> :In <sup>3+</sup> ,Mn <sup>2+</sup>                                                                  | 562      | 562        | Full                  | 10           | 13        |
| SrZnP <sub>2</sub> O <sub>7</sub> :Sm <sup>3+</sup> ,Li <sup>+</sup>                                                     | 596      | 596        | Full                  | 0.1          | 14        |
| Mg <sub>3</sub> Y <sub>2</sub> Ge <sub>3</sub> O <sub>12</sub> :Pr <sup>3+</sup> ,Ce <sup>3+</sup> ,<br>Er <sup>3+</sup> | 488, 610 | 488, 610   | Full                  | 0.1          | 15        |
| Lu <sub>3</sub> Ga <sub>5</sub> O <sub>12</sub> :Eu <sup>3+</sup>                                                        | 588      | 588        | Full                  | 1            | 16        |
| CsCdCl <sub>3</sub> :Mn <sup>2+</sup> ,R<br>(R = Ti, Zr, Hf, Sn)                                                         | 570-605  | 570-605    | Full                  | 1            | 17        |
| LiYGeO <sub>4</sub> :Mn <sup>2+</sup> , Bi <sup>3+</sup>                                                                 | 350 620  | 620        | Partial               | -            | 18        |
| Y <sub>3</sub> Al <sub>2</sub> Ga <sub>3</sub> O <sub>12</sub> :Cr <sup>3+</sup>                                         | 710      | 710        | Full                  | 0.1          | 19        |
| LiInSi <sub>2</sub> O <sub>6</sub> :Cr <sup>3+</sup> ,Pr <sup>3+</sup>                                                   | 750      | 750        | Full                  | -            | 20        |
| LaGaO <sub>3</sub> :Sb <sup>3+</sup> ,Cr <sup>3+</sup>                                                                   | 750      | 750        | Full                  | 500          | 21        |

|                                                                       |               |           |         |     |    |
|-----------------------------------------------------------------------|---------------|-----------|---------|-----|----|
| $\text{ScBO}_3:\text{Cr}^{3+}$                                        | 771           | 771       | Full    | 1.5 | 22 |
| $\text{CaTiO}_3:\text{Cr}^{3+}, \text{Y}^{3+}$                        | 772 nm        | 772 nm    | Full    | 1   | 23 |
| $\text{NaLuF}_4:\text{Gd}^{3+}, \text{Tm}^{3+}$                       | 800           | 800       | Full    | 0.3 | 24 |
| $\text{Cs}_2\text{ZrCl}_6:\text{W}^{4+}$                              | 445<br>900    | 900       | Partial | 10  | 25 |
| $\text{NaYF}_4:\text{Ln}^{3+}@\text{NaYF}_4$<br>(Ln = Er, Nd, Ho, Tm) | 1000-<br>1700 | 1000-1700 | Full    | 72  | 26 |

**Table S2.** Crystallographic data of  $\text{LiLu}(\text{WO}_4)_2:0.5\%\text{Bi}^{3+}$  as determined by the Rietveld refinement of powder XRD data at room temperature\*.

|   | Atom | Category | x        | y        | z        | Occ.  |
|---|------|----------|----------|----------|----------|-------|
| 1 | Li1  | Li+1     | 0.000000 | 0.315000 | 0.250000 | 1     |
| 2 | Bi1  | Bi+3     | 0.500000 | 0.694236 | 0.250000 | 0.005 |
| 3 | Lu1  | Lu+3     | 0.500000 | 0.694236 | 0.250000 | 0.995 |
| 4 | W1   | W+6      | 0.265301 | 0.182932 | 0.015583 | 1     |
| 5 | O1   | O-2      | 0.160872 | 0.110788 | 0.603983 | 1     |
| 6 | O2   | O-2      | 0.231433 | 0.376439 | 0.136655 | 1     |
| 7 | O3   | O-2      | 0.277655 | 0.622643 | 0.386333 | 1     |
| 8 | O4   | O-2      | 0.342225 | 0.095580 | 0.378279 | 1     |

\* monoclinic crystal structure, space group: P12/c1, a = 4.9852 Å, b = 5.79404 Å, c = 10.79881 Å, alpha = 90°, beta = 114.3598°, gamma = 90°, V = 284.1485 Å<sup>3</sup>, R<sub>wp</sub> = 4.18084%, R<sub>p</sub> = 5.34462%, and  $\chi^2 = 1.87171$ .

## Supplementary Figure (Figure S1-S11)

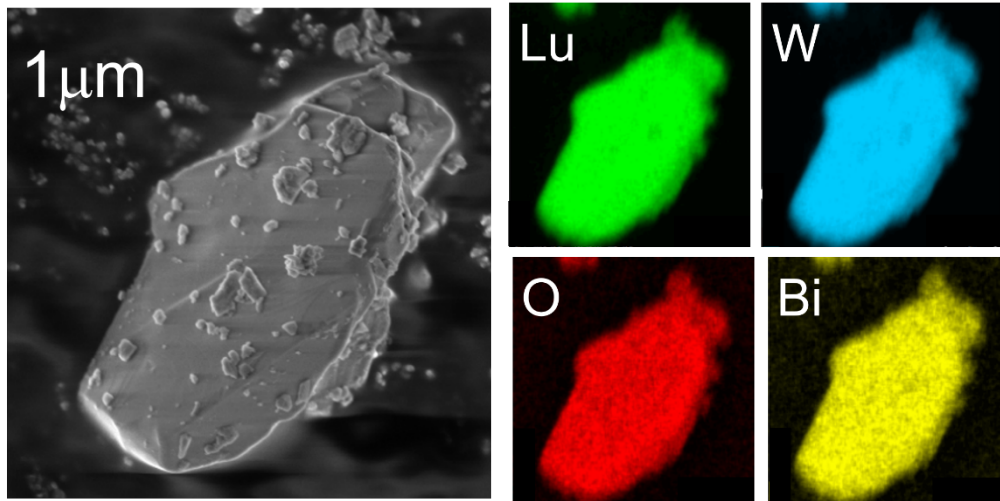

**Fig. S1** SEM image of LLWO:0.5%Bi<sup>3+</sup> phosphor and corresponding elemental mapping.

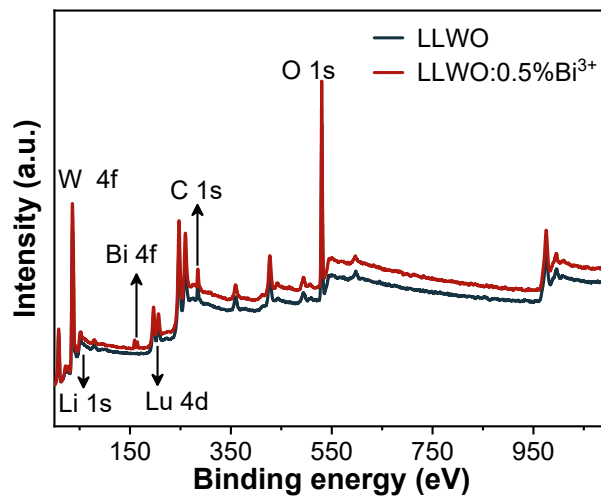

**Fig. S2**

**Fig. S2.** XPS survey scan spectra of LLWO and LLWO:0.5%Bi<sup>3+</sup> samples.

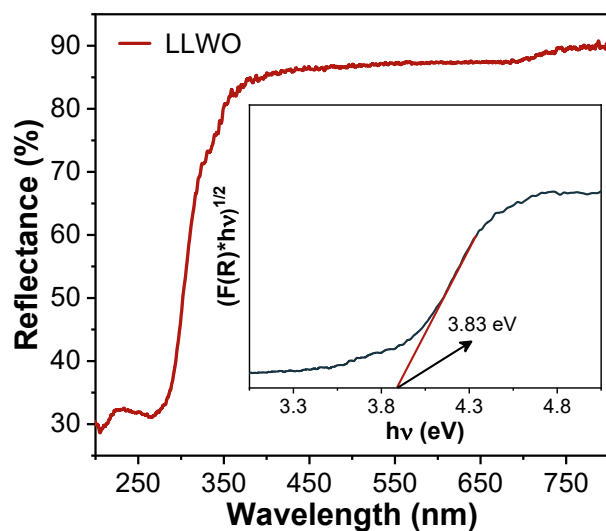

**Fig. S3** DRS of LLWO host. The inset shows the relationship of  $[F(R) \cdot hv]^{1/2}$  versus photon energy  $h\nu$  for LLWO.

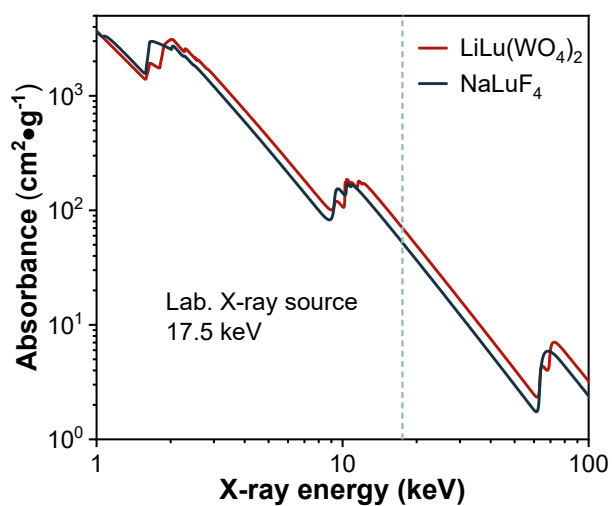

**Fig. S4** Absorption spectra of LLWO and NaLuF<sub>4</sub> as a function of X-ray energy.

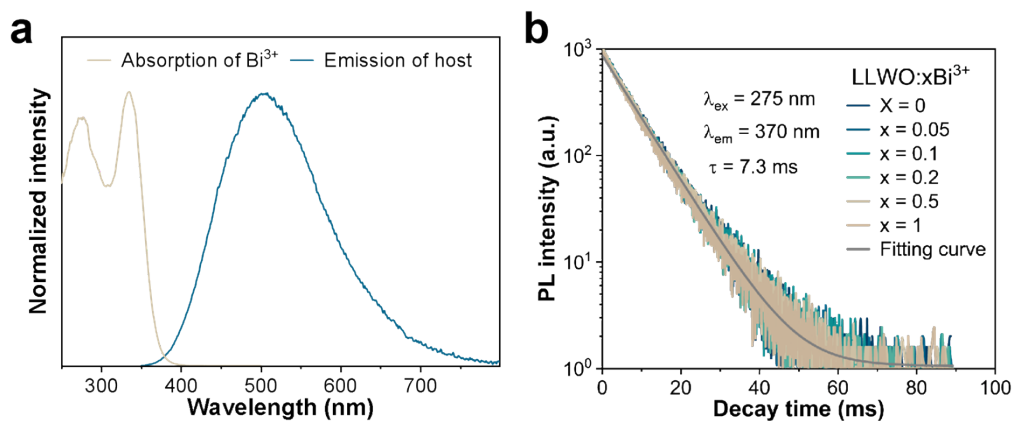

**Fig. S5** a) PL and PLE spectra of LLWO:0.5%Bi<sup>3+</sup>. The PL spectrum was recorded with 275 nm excitation, while the PLE spectrum was monitored at an emission wavelength of 550 nm. The former reflects the intrinsic emission of the host, and the latter reflects the absorption of Bi<sup>3+</sup>. b) Fluorescence decay and lifetimes of LLWO:x%Bi<sup>3+</sup> phosphors.

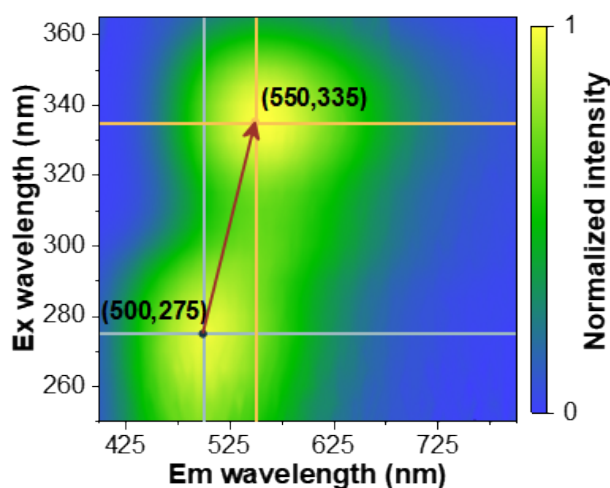

**Fig. S6** Contour plot of the excitation-dependent PL spectrum of the LLWO:0.5%Bi<sup>3+</sup>.

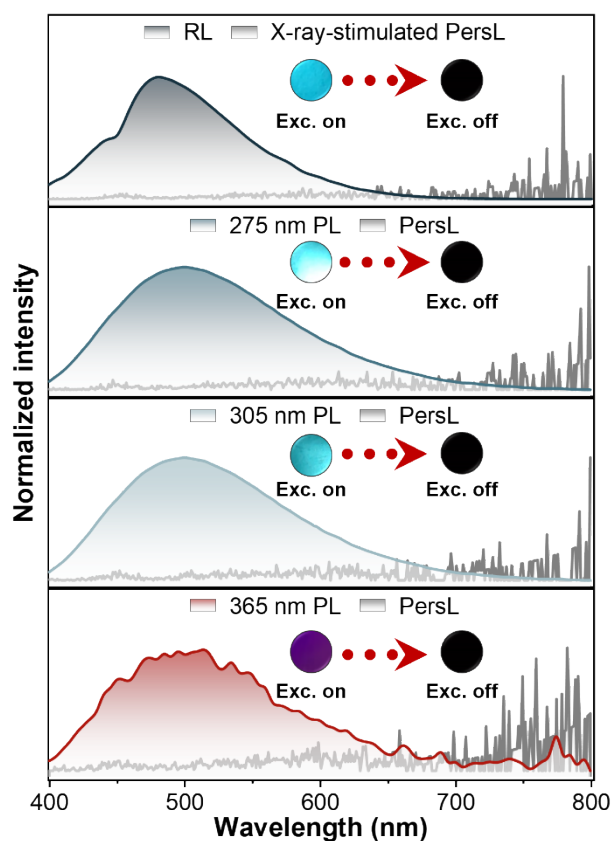

**Fig.S7** Comparison of normalized RL, PL, and PersL spectra and photographs of LLWO under/after different excitation sources. Notably, the LLWO host exhibits weak emission upon 365 nm excitation, the purple luminescence is originated to the excitation source.

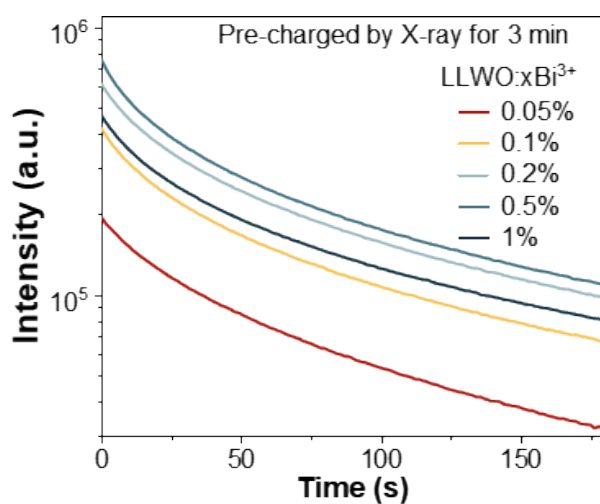

**Fig. S8** PersL decay curves of LLWO: $x\text{Bi}^{3+}$  ( $x = 0.05\text{--}1$  mol%) monitored at 550 nm after 3.5 W X-ray irradiation for 3 min.

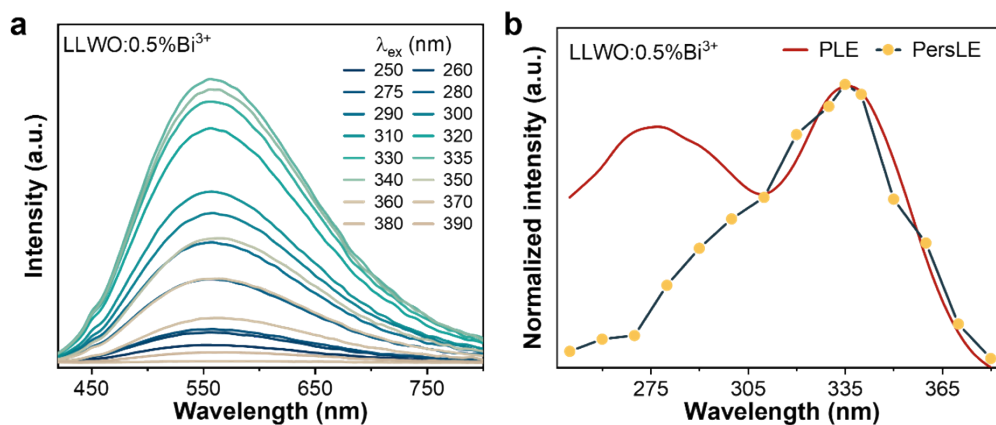

**Fig. S9.** a) PersL spectra of LLWO:0.5%Bi<sup>3+</sup> under different excitation wavelength. The sample was pre-irradiated by UV lamp for 3 min and decayed for 10 s before each measurement. Heat treatment was conducted to clear traps after each measurement. b) PersL excitation spectrum obtained by plotting the integral intensity of PersL emission spectra.

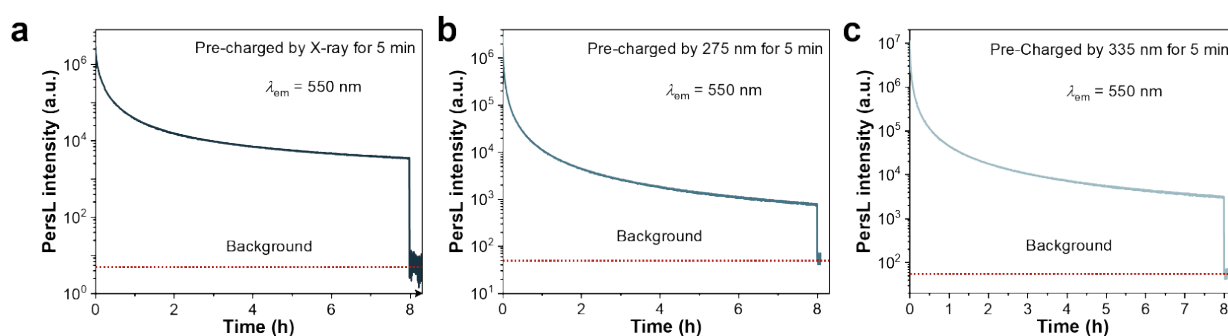

**Fig. S10** a-c) After being charged with different excitation sources (3.5 W X-ray, 275 nm, and 335 nm) for 5 min, PersL decay curves of LLWO:0.5%Bi<sup>3+</sup> recorded for 8 h.

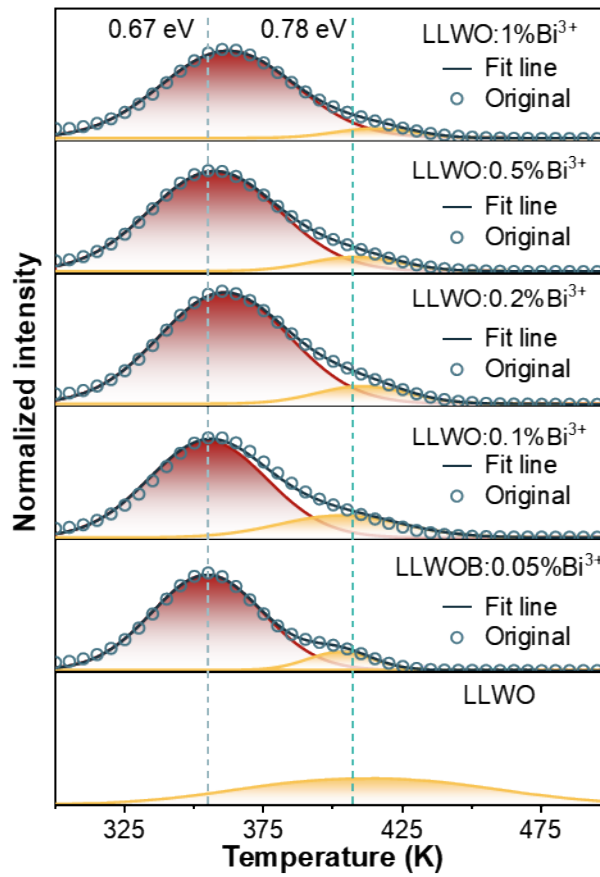

**Fig. S11** Deconvolution TL glow curves of LLWO: $x\text{Bi}^{3+}$  ( $x = 0\text{--}1\%$ ).

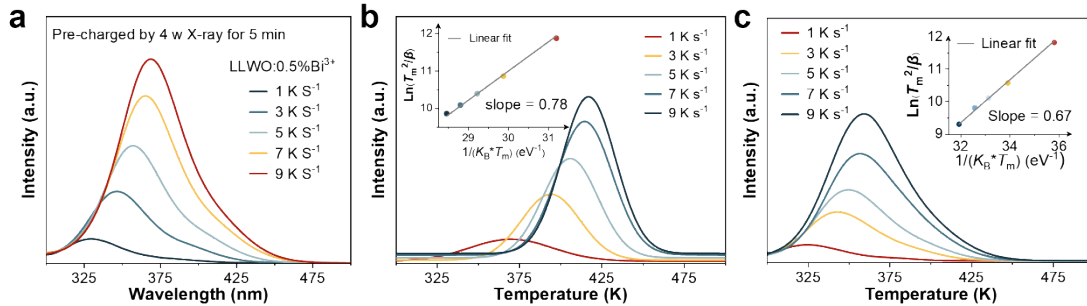

**Fig. S12.** a) TL glow curves of LLWO:0.5% $\text{Bi}^{3+}$  at different heating rates  $\beta$  from 1 to 9  $\text{K}\cdot\text{S}^{-1}$ . b, c) Deconvolution TL glow curves of LLWO:0.5% $\text{Bi}^{3+}$ . Inset shows the fitting for the determination of the trap depth using the Hoogenstraaten method.

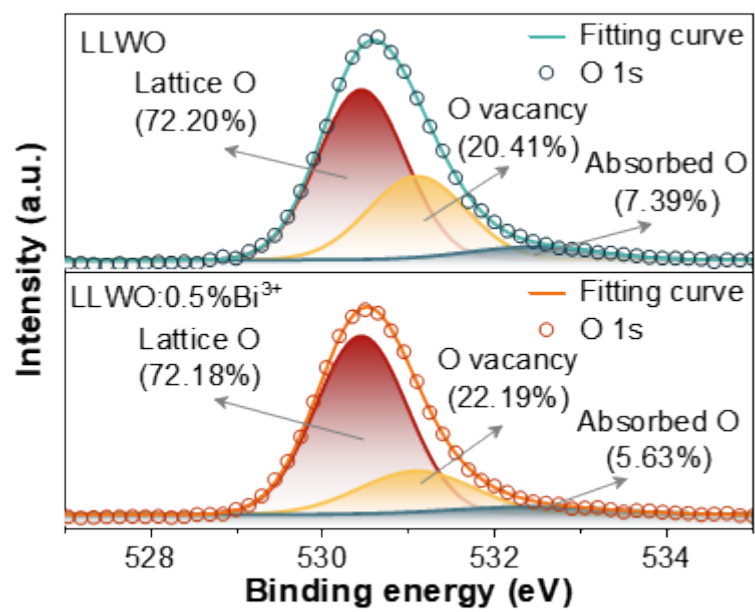

**Fig. S13** XPS spectra of O 1s from the undoped LLWO and LLWO:0.5%Bi<sup>3+</sup>.

## Reference

- 1 Y.-M. Yang, Z.-Y. Li, J.-Y. Zhang, Y. Lu, S.-Q. Guo, Q. Zhao, X. Wang, Z.-J. Yong, H. Li, J.-P. Ma, Y. Kuroiwa, C. Moriyoshi, L.-L. Hu, L.-Y. Zhang, L.-R. Zheng and H.-T. Sun, *Light Sci. Appl.*, 2018, **7**, 88.
- 2 W. Zhao, L. Li, T. Li, J. Qiu and Y. Yang, *Adv. Opt. Mater.*, 2024, **12**, 2401320.
- 3 S. Zheng, Y. Chen, K. Lin, L. Qiu, Z. Zheng, Y. Cao and Y. Lin, *Ceram. Int.*, 2025, **51**, 23033–23039.
- 4 B.-M. Liu, Y. Lin, Y. Liu, S. Zhang, J. Wang, H. Zhang and J. Zhu, *Inorg. Chem. Front.*, 2024, **11**, 2049–2057.
- 5 G. Cai, T. Delgado, M. Allix, D. Rytz and B. Viana, *Adv. Opt. Mater.*, 2025, **13**, e01784.
- 6 M. Li, W. You, S. Liu, J. Li, H. Zhang, G. Pan and Y. Mao, *Laser Photonics Rev.*, 2025, **19**, 2500092.
- 7 X. Jiang, X. Gao, L. Li, P. Zhou, S. Wang, T. Liu, J. Zhou, H. Zhang, K. Huang, Y. Li, M. Wang, Z. Jin, E. Xie, W. Liu and G. Han, *ACS Appl. Mater. Interfaces*, 2023, **15**, 21228–21238.
- 8 Z. Wu, L. Li, X. Lv, H. Suo, C. Cai, P. Lv, M. Ma, X. Shi, Y. Yang, L. Marciniak and J. Qiu, *Chem. Eng. J.*, 2022, **438**, 135573.
- 9 S. Zhang, Y. Wang, D. Deng, S. Zhou, S. Xu and L. Lei, *Laser Photonics Rev.*, 2024, **18**, 2400357.
- 10 X. Ou, X. Qin, B. Huang, J. Zan, Q. Wu, Z. Hong, L. Xie, H. Bian, Z. Yi, X. Chen, Y. Wu, X. Song, J. Li, Q. Chen, H. Yang and X. Liu, *Nature*, 2021, **590**, 410–415.
- 11 Y. Wang, H. Zou, D. Deng, D. Shen, S. Xu and L. Lei, *Chem. Eng. J.*, 2024, **500**, 156964.
- 12 W. Xu, M. Zhou, R. Deng, X. Liu, L. Yao, J. Zhou and J. Qiu, *Chem. Eng. J.*, 2024, **499**, 156406.
- 13 P. Zhang, W. Xie, X. Miao, Z. Lin, Y. Yang, W. Liu and W. Liu, *Chem. Eng. J.*, 2024, **502**, 158157.
- 14 Y. Xiang, L. Zhong, Y. Long, S. Liu, Z. Cheng, S. Rao, J. Hong, B. Lei, H. Suo, J. Zhang, L. Zhou, F. Wang and M. Wu, *Adv. Mater.*, **n/a**, e15825.
- 15 X. Lin, Y. Lv, G. Zhuang, J. Zou, M. Lv, S. Xu, L. Liu, G. Liu, L. Ma, H. Wu, Y. Li and C. Li, *Laser Photonics Rev.*, **n/a**, e01047.
- 16 H. Hu, T. Qi, S. Wang, D. Wang, J. Xu, H. Wu, H. Wu, Z. Hao, Q. Liu and L. Zhang, *Inorg. Chem.*, 2025, **64**, 25377-25383.
- 17 X. Zhou, K. Han, Y. Wang, J. Jin, S. Jiang, Q. Zhang and Z. Xia, *Adv. Mater.*, 2023, **35**, 2212022.
- 18 Y. Lv, C. Li, N. Zhao, R. Yang, J. Zhu, Y. Liu, C. Huang, S. You and J. Ueda, *Adv. Funct. Mater.*, **n/a**, e11845.
- 19 V. Boiko, J. Zeler, M. Markowska, Z. Dai, A. Gerus, P. Bolek, E. Zych and D. Hreniak, *J. Rare Earths*, 2019, **37**, 1200–1205.
- 20 G. Abulipizi, Z. Yu, S. Lin, N. Zhang, F. Xu, X. Wang and Z. Li, *Ceram. Int.*, 2023, **49**, 39664–39670.
- 21 B.-M. Liu, R. Zou, S.-Q. Lou, Y.-F. Gao, L. Ma, K.-L. Wong and J. Wang, *Chem. Eng. J.*, 2021, **404**, 127133.
- 22 R. Liu, X. Liao, W. Shi, J. Zhang, X. Fu, T. Lin, Z. Liu, N. Chen and H. Zhang, *J. Mod. Opt.*, 2025, **72**, 1025–1034.

- 23 Y. Xu, G. Abulipizi, Y. Wang, Y. Fang, Z. Yu, J. Zhou and Z. Li, *ACS Appl. Mater. Interfaces*, 2024, **16**, 55823–55831.
- 24 C. Zhou, D. Li, L. Lei, G. Bai, H. Wang, X. Liu, S. Xu and J. Qiu, *J. Lumin.*, 2022, **251**, 119241.
- 25 R. Yang, K. Song, Y. Zheng, C. Zhan, Y. Wang, C. Lin, T. Zhou, Y. Zhuang and R. Xie, *Adv. Powder Mater.*, 2025, **4**, 100343.
- 26 P. Pei, Y. Chen, C. Sun, Y. Fan, Y. Yang, X. Liu, L. Lu, M. Zhao, H. Zhang, D. Zhao, X. Liu and F. Zhang, *Nat. Nanotechnol.*, 2021, **16**, 1011–1018.
